# Supplementary material for: Nanochannel conduction in piezoelectric polymeric membrane using swift heavy ions and nanoclay
Source: Royal Society of Chemistry journal article supplement (doi:10.1039/c3ra23176c), 2013-01-01
Supplement: c3ra23176c.pdf [file c3ra23176c.pdf]

## Supplementary Data

### Nanochannel Conduction in Piezoelectric Polymeric Membrane using Swift Heavy Ions and Nanoclay

Karun Kumar Jana,<sup>1</sup> Niraj Kumar Vishwakarma,<sup>2</sup> Biswajit Ray,<sup>2</sup> Saif A. Khan,<sup>3</sup>

Devesh K. Avasthi,<sup>3</sup> Manjusri Misra<sup>4</sup> and Pralay Maiti<sup>\*1</sup>

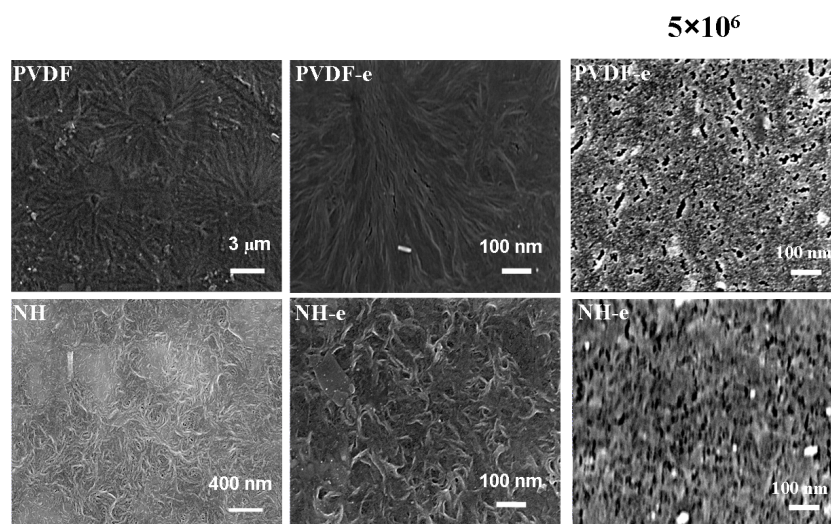

**Figure S1:** Top layer SEM images of pure *PVDF*, *PVDF* after etching (*PVDF-e*), irradiated *PVDF* after etching at fluence  $5 \times 10^6$  ions/cm<sup>2</sup>. Bottom layer pure *NH*, *NH* after etching (*NH-e*) and irradiated *NH* after etching with fluence  $5 \times 10^6$  ions/cm<sup>2</sup>. It is obvious that unirradiated specimens do not exhibit any channels or holes alternatively confirm that irradiation is a precondition to create channel in polymeric matrix/membrane. Spherulitic morphology is evident for pure *PVDF* while mesh-like morphology is prominent in nanohybrid and their respective morphologies do not change after etching.

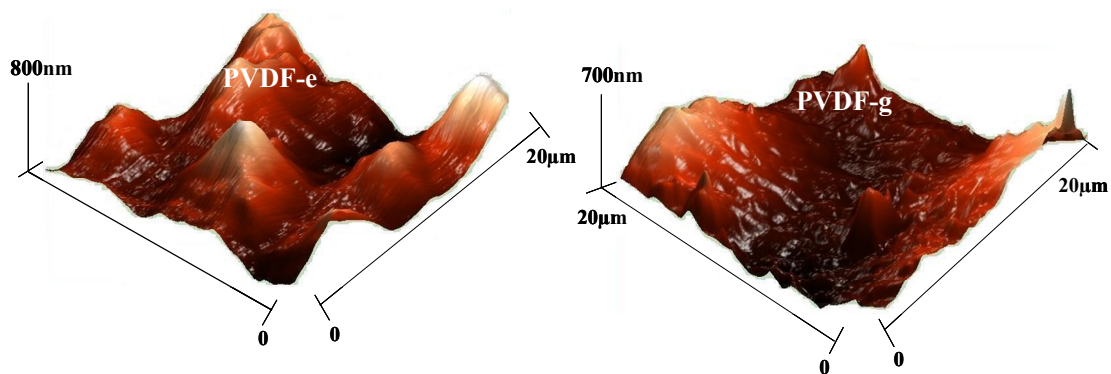

**Figure S2:** AFM topographs of *PVDF-e*, *PVDF-g*, with fluence  $1 \times 10^{10}$  ions/cm<sup>2</sup>. It is important to mention that PPy grafting on to *PVDF* corresponding *NH* as shown in Fig. 3 of the manuscript.

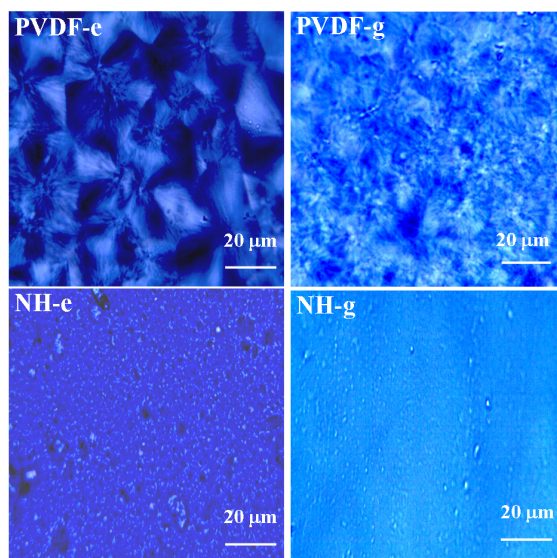

**Figure S3:** Polarized optical micrographs of *PVDF-e*, *PVDF-g*, *NH-e* and *NH-g* with fluence  $1 \times 10^{10}$  ions/cm<sup>2</sup>. The signs –e and –g indicate the respective etched and grafted specimens. Hence, creating hole on the irradiated samples and grafting of polypyrrole has been confirmed.

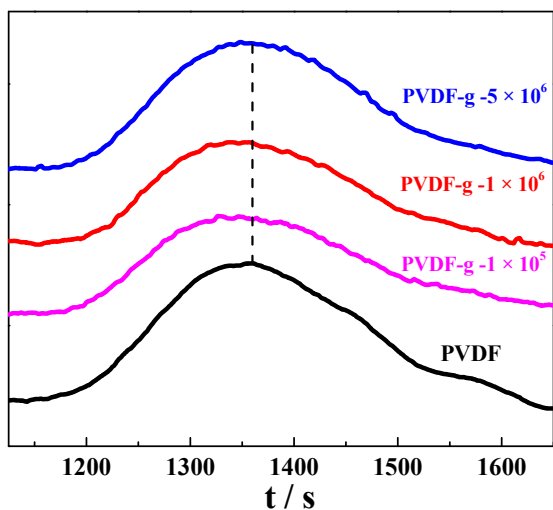

**Figure S4:** GPC traces of neat *PVDF* and grafted *PVDF* with three different fluences.

| Sample code                       | $M_w$ (g.mol <sup>-1</sup> ) | $M_w/M_n$ ( <i>PDI</i> ) |
|-----------------------------------|------------------------------|--------------------------|
| <i>PVDF</i>                       | $2.7 \times 10^{-5}$         | 2.09                     |
| <i>PVDF-g-1</i> × 10 <sup>5</sup> | $2.5 \times 10^{-5}$         | 3.03                     |
| <i>PVDF-g-1</i> × 10 <sup>6</sup> | $2.6 \times 10^{-5}$         | 2.99                     |
| <i>PVDF-g-5</i> × 10 <sup>6</sup> | $2.7 \times 10^{-5}$         | 2.19                     |
| <i>NH</i>                         | $2.5 \times 10^{-5}$         | 2.31                     |
| <i>NH-g-1</i> × 10 <sup>5</sup>   | $2.7 \times 10^{-5}$         | 2.13                     |
| <i>NH-g-1</i> × 10 <sup>6</sup>   | $2.8 \times 10^{-5}$         | 2.44                     |
| <i>NH-g-5</i> × 10 <sup>6</sup>   | $2.9 \times 10^{-5}$         | 2.16                     |

**Table S1.** Molecular weight and *PDI* value of grafted with *PVDF* and *NH* samples.

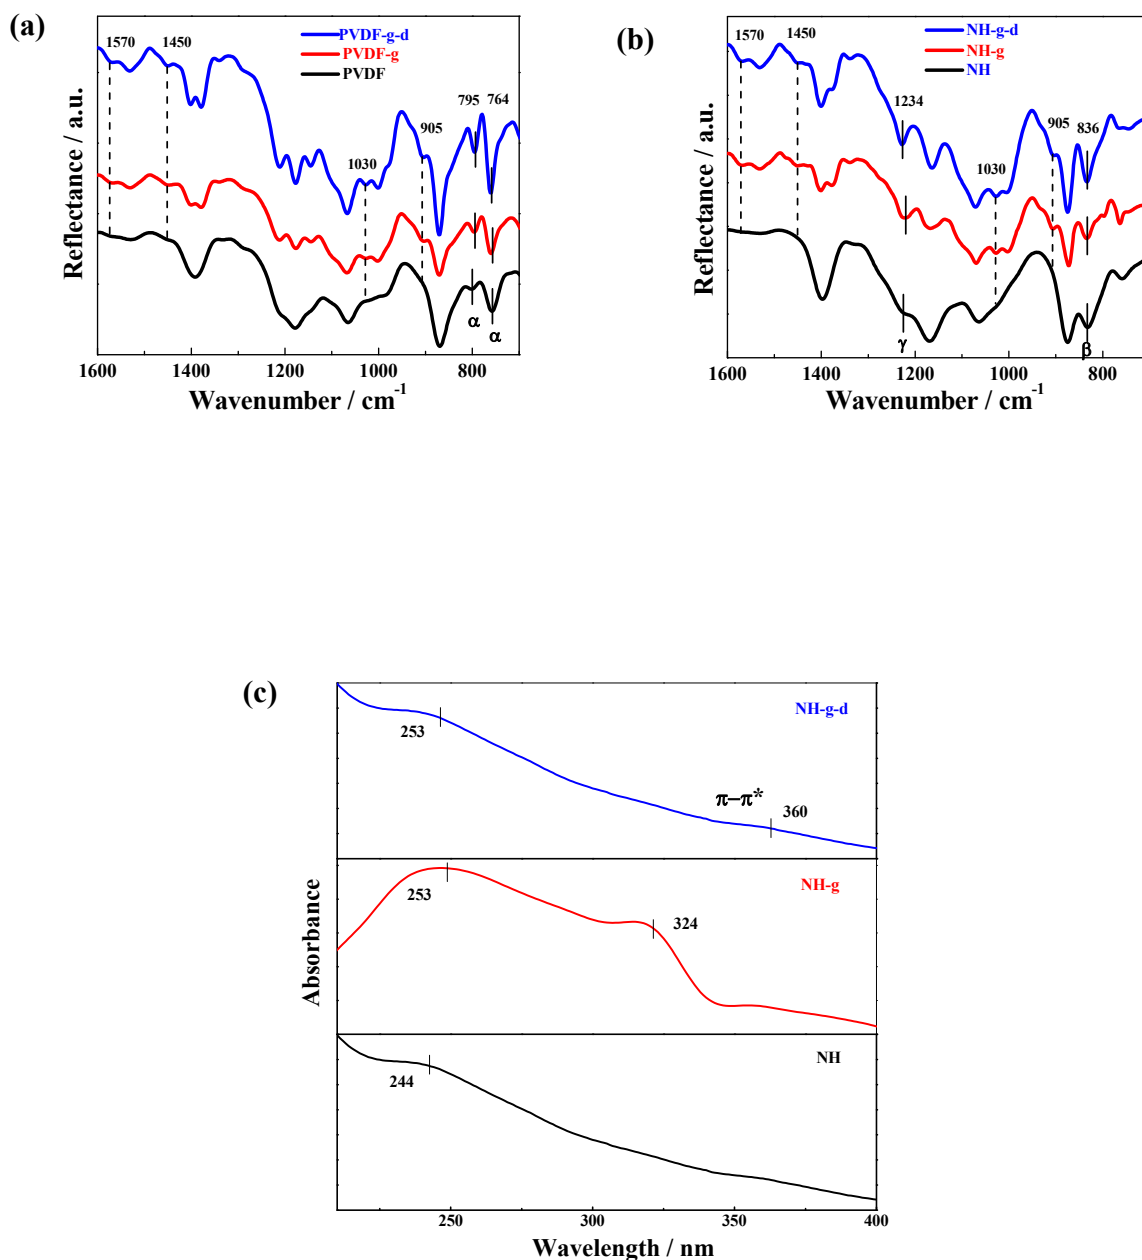

**Figure S5:** FTIR spectra of (a) neat *PVDF*, *PVDF-g* and *PVDF-g-d* specimen. (b) Pristine *NH*, *NH-g* and *NH-g-s* samples. This result clearly indicates that the peak intensity increases after doped. (c) *UV-Vis*. absorption spectra of pure *NH* and grafted *NH*, grafted-doped *NH*. Pure *NH* does not have any absorption peak while characteristics absorption peaks of polypyrrole and sulphonate groups are clearly visible in *NH-g* and *NH-g-d* specimen suggesting grafting and doping on the *PVDF* chain.

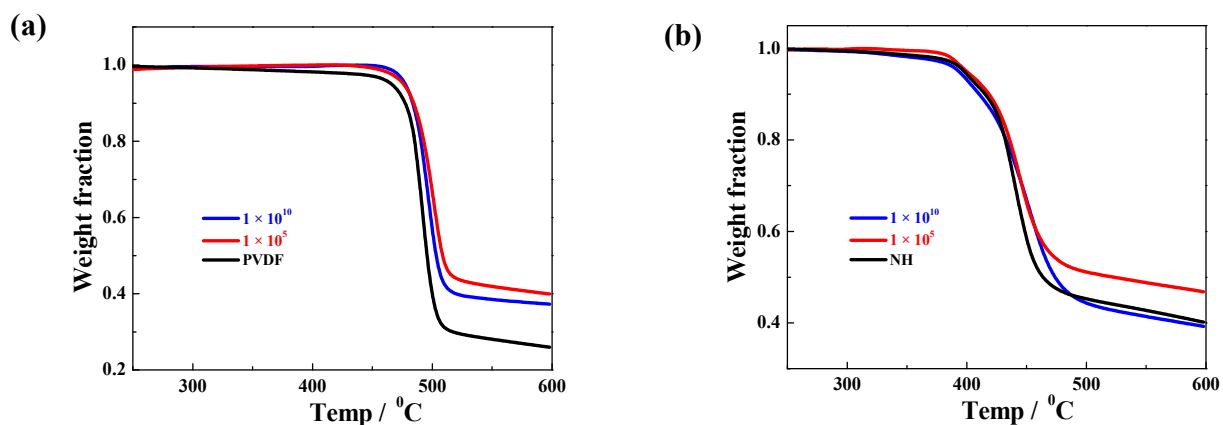

**Figure S6:** TGA thermograms of neat *PVDF*, *PVDF-g* at fluence  $1 \times 10^5$  and *PVDF-g* with fluence  $1 \times 10^{10}$  ions/cm<sup>2</sup>. (b) pristine *NH* and *NH-g* with the fluences  $1 \times 10^5$  and  $1 \times 10^{10}$  ions/cm<sup>2</sup>, respectively.

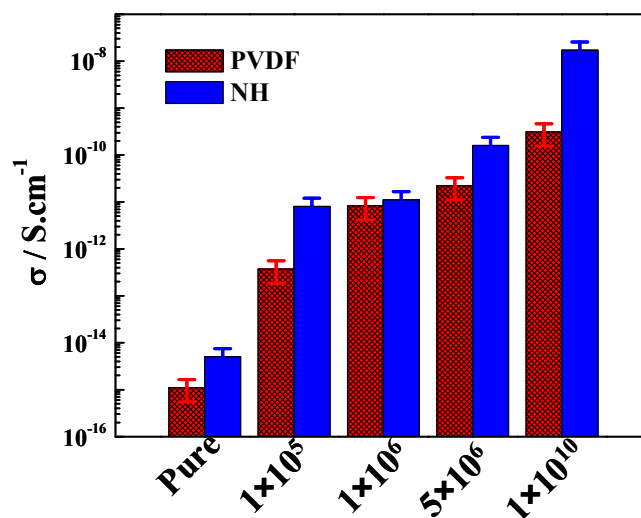

**Figure S7:** Bulk electrical conductivity measurement of pristine *PVDF*, *NH* and grafted specimen of *PVDF*, *NH* with four different fluences.

| Sample Code                  | $E_a$ (KJ/mole) |
|------------------------------|-----------------|
| PVDF                         | 10.65           |
| NH                           | 6.88            |
| PVDF-g-d- $1 \times 10^{10}$ | 12.80           |
| NH-g-d- $1 \times 10^{10}$   | 26.93           |
| PVDF-g-s- $1 \times 10^{10}$ | 12.58           |
| NH-g-s- $1 \times 10^{10}$   | 25.86           |

**Table S2.** Activation energy of grafted, dopant and sulphonated specimen of *PVDF* and *NH* with fluence  $1 \times 10^{10}$  ions/cm<sup>2</sup>.
